# Supplementary material for: Quantifying Intramolecular Binding in Multivalent Interactions: A Structure-Based Synergistic Study on Grb2-Sos1 Complex
Source: PLOS journal article supplement (doi:10.1371/journal.pcbi.1002192), 2011-10-13
Supplement: S2 (10.1371/journal.pcbi.1002192.s002) [file journal.pcbi.1002192.s002]

|                                        |    | Peptide bound to N-SH3 domain |             |             |             |             |
|----------------------------------------|----|-------------------------------|-------------|-------------|-------------|-------------|
|                                        |    | P1                            | P2          | P3          | RP          | P4          |
| Peptide<br>bound to<br>C-SH3<br>domain | P1 | -                             | 1.0 (10.0)  | 1.2 (14.6)  | 0.7 (20.9)  | 0.6 (20.5)  |
|                                        | P2 | 0.7 (54.4)                    | -           | 1.1 (204.2) | 0.9 (181.5) | 0.7 (163.5) |
|                                        | P3 | 1.0 (55.8)                    | 0.8 (87.5)  | -           | 1.2 (167.5) | 1.0 (156.5) |
|                                        | RP | 0.7 (95.7)                    | 0.9 (106.9) | 1.2 (167.5) | -           | 0.3 (469.6) |
|                                        | P4 | 0.5 (85.7)                    | 0.7 (105.4) | 0.9 (154.2) | 0.3 (514.0) | -           |

Table S2: Effective concentration of motif ( $C_{eff}$  in mM) near the second binding site when another motif is bound to the appropriate SH3 domain of Grb2. The probability of the distance between the binding sites ( $p_{bs}$ ) is approximated using a set of delta functions. The delta functions were centered at the distance between the two ends of the motif which depends on the type of motif (class I or class II) and the order they occur in the sequence (see Figure 6). These distances were calculated from the modeled structure of motifs P1 and P2 bound to the N- and C-SH3 domains of Grb2 respectively. Effective dissociation constant ( $1/\bar{K}_{ij}^{NC}$  in  $\mu\text{M}$ ) of both motifs in Sos1 binding to Grb2 using the delta function to estimate  $p_{bs}$  is given in parenthesis.
